# Supplementary material
Source: HighWire-hosted journal article supplement (https://bmjopen.bmj.com/content/12/7/e058070)
Supplement: inline-supplementary-material-1 [file inline-supplementary-material-1.pdf]

## Review Protocol

### Objective

To evaluate the transparency of COVID-19 related RCT reporting in mainland China through comparing trial registrations with publications.

### Ethics Approval

The study is exempt from ethics approval because only publicly available databases and registries will be used as data source. No human participants and animal subjects will be involved in the study.

### Eligibility Criteria for Registrations

Registered randomized controlled trials related to prevention, treatment or prognosis of COVID-19 in mainland China will be included. Case report, case series, cross-sectional study, case-control study, cohort study, survey and other observational studies will be excluded. Studies will be excluded if randomization is not used or without a control group. For multicenter trials, all registered centers must be within mainland China to meet eligibility criteria.

### Data Source and Search Strategy for Registrations

International Clinical Trials Registry Platform (ICTRP), Chinese Clinical Trial Registry (ChiCTR), ClinicalTrials.gov (NCT), the ISRCTN registry (ISRCTN) and EU Clinical Trial Register (EUCTR) will be searched. For ICTRP and ChiCTR, complete lists of COVID-19 clinical trial registrations will be downloaded. Filters will be applied to identify studies which meet eligibility criteria. For NCT, the page listing COVID-19 studies will be accessed and eligible studies will be identified using website filters and the map panel. ISRCTN and EUCTR will be manually searched with the keywords "COVID-19", "Sars-Cov-2", "covid19" and "2019-nCov". All search results will be examined manually to ensure their eligibility.

### Data Source and Search Strategy for Publications

PubMed, Embase, Cochrane Library, CNKI.net and Wanfangdata will be searched using trial

registration IDs of eligible trials. Only publications in English and Chinese will be included.

### **Data Extraction**

From trial registrations, registration ID, date of registration/first submission, date of last update, date of first enrollment, scientific/official titles, primary purpose, recruitment status, intervention, source of funding, primary sponsor, ethics approval information, setting, randomization and masking methods, inclusion and exclusion criteria, primary/secondary outcomes and time frame of outcome measurement will be extracted.

From publications, title, estimated/actual enrollment, center name, inclusion/exclusion criteria, masking, primary outcomes and time frame of outcome measurement will be extracted.

### **Risk of Bias Assessment**

Risk of bias assessment will be performed with RoB 2 for full reports of trials.

### **Data Synthesis**

The screening process of registrations will be presented with a flow diagram. Characteristics of included trial registrations will be presented with descriptive statistics, in count and proportion for categorical data, or with median, max value, minimum value and interquartile range for quantitative data. The trend of registrations from early 2020 will be presented with line chart. Estimated/actual enrollment, center name, inclusion/exclusion criteria, masking method, primary outcome and time frame of primary outcome measurement information extracted from trial registrations and publications will be compared, and count and percentage of inconsistency within each domain will be presented. Risk of bias assessment results will be presented with figure.

### **Review Process**

The screening process, data extraction, risk of bias assessment, registration-publication comparison will be independently completed by two reviewers, and the results will be compared. Disagreements will be resolved through discussion.

## Protocol Amendments

May-2021

For trials which are repeatedly registered on two or more clinical trial registries, if they have any publication, the registration not cited by publication will be excluded from the analysis. If all or none of the repeated registrations are cited by publications, the record with most recent update time will be included in the analysis. Repeated registrations will be detected by reviewing the title, objective and name of principle investigator.

Publications citing an eligible trial registration identifier but declared to be of non-RCT design will be excluded from the analysis. The number of such publications will be reported.

Feb-2022

Google Scholar will be searched for publications to ensure the completeness of search results.

Information extracted from protocols and corresponding full reports will also be compared to evaluate protocol-report consistency.

## Search Strategy

### Clinical Trial Registration

International Clinical Trials Registry Platform (ICTRP, <https://www.who.int/clinical-trials-registry-platform>) was accessed and a list of COVID-19 trials (updated on 22-Jan-2022) in csv format was downloaded. The file was opened with Microsoft Excel. The following filters were applied to "Study type" column: "intervention" "interventional" "interventional clinical trial of medicinal product" "interventional study" "treatment study" "prevention" "prognosis study". The following filters were applied to "Countries" column: "China" "China?" "Chinese" "The People's republic of China". From the "Study design" column, "Case study" "Case-control study" "Cohort study" "Cross-sectional" studies, non-randomized/quasi-randomized studies and studies with single arm or historical control were excluded.

Chinese Clinical Trial Registry (ChiCTR, <http://www.chictr.org.cn/enIndex.aspx>) was accessed and index of studies of COVID-19 (updated on 22-Dec-2021) in csv format was downloaded. The ChiCTR index was then mapped to the ICTRP COVID-19 trials list to identify any studies listed in ChiCTR but not in ICTRP. Studies registered after 22-Dec-2021 were screened manually.

List of COVID-19 related studies from ClinicalTrials.gov was accessed (<https://clinicaltrials.gov/ct2/results?cond=COVID-19>). The filter "Study type - Interventional (Clinical Trial)" was applied, and studies registered in mainland China were identified using the "On Map" panel. The listed studies were downloaded and compared with ICTRP records in case of omissions.

In ISRCTN registry (ISRCTN, <https://www.isrctn.com/>) and EU Clinical Trial Register (EUCTR, <https://www.clinicaltrialsregister.eu/>), the registry was searched with the following search string: "covid19 or COVID-19 or SARS-Cov-2 or 2019-nCov", and the country of recruitment was set to "China" and "Outside EU/EEA", respectively. Search results were also compared with ICTRP records.

All above-mentioned registries were accessed on 1-Feb-2022.

## Publication

Search was performed in PubMed (<https://pubmed.ncbi.nlm.nih.gov/>), Embase (<https://www.embase.com/>), Cochrane Library (<https://www.cochranelibrary.com/search>), Google Scholar (<https://scholar.google.com/>), CNKI.net (<https://www.cnki.net/>) and Wanfangdata (<https://www.wanfangdata.com.cn/>) using the trial registration number with exact match method.

## Literatures

This systematic review identified 85 reports<sup>1-85</sup> and 20<sup>86-105</sup> protocols from 415 clinical trial registration records. For further analysis, 8 reports<sup>78-85</sup> were excluded because non-RCT study design was adopted.

1. Cao B, Wang Y, Wen D, et al. A Trial of Lopinavir-Ritonavir in Adults Hospitalized with Severe Covid-19. *N Engl J Med*. 2020;382(19):1787-1799.
2. Che Y, Liu X, Pu Y, et al. Randomized, double-blinded and placebo-controlled phase II trial of an inactivated SARS-CoV-2 vaccine in healthy adults. *Clin Infect Dis*. 2020.
3. Chen J, Liu D, Liu L, et al. A Pilot Study of Hydroxychloroquine in Treatment of Patients with Moderate COVID-19. *Journal of Zhejiang University (Medical Sciences)*. 2020;49(2).
4. Chen J, Xia L, Liu L, et al. Antiviral Activity and Safety of Darunavir/Cobicistat for the Treatment of COVID-19. *Open Forum Infect Dis*. 2020;7(7):ofaa241.
5. Cheng LL, Guan WJ, Duan CY, et al. Effect of Recombinant Human Granulocyte Colony-Stimulating Factor for Patients With Coronavirus Disease 2019 (COVID-19) and Lymphopenia: A Randomized Clinical Trial. *JAMA Intern Med*. 2021;181(1):71-78.
6. Hu K, Wang M, Zhao Y, et al. A Small-Scale Medication of Leflunomide as a Treatment of COVID-19 in an Open-Label Blank-Controlled Clinical Trial. *Viral Sin*. 2020;35(6):725-733.
7. Huang YQ, Tang SQ, Xu XL, et al. No Statistically Apparent Difference in Antiviral Effectiveness Observed Among Ribavirin Plus Interferon-Alpha, Lopinavir/Ritonavir Plus Interferon-Alpha, and Ribavirin Plus Lopinavir/Ritonavir Plus Interferon-Alpha in Patients With Mild to Moderate Coronavirus Disease 2019: Results of a Randomized, Open-Labelled Prospective Study. *Front Pharmacol*. 2020;11:1071.
8. Leng Z, Zhu R, Hou W, et al. Transplantation of ACE2(-) Mesenchymal Stem Cells Improves the Outcome of Patients with COVID-19 Pneumonia. *Aging Dis*. 2020;11(2):216-228.
9. Li C, Luo F, Liu C, et al. Effect of a genetically engineered interferon-alpha versus traditional interferon-alpha in the treatment of moderate-to-severe COVID-19: a randomised clinical trial. *Ann Med*. 2021;53(1):391-401.
10. Li J, Hui A, Zhang X, et al. Safety and immunogenicity of the SARS-CoV-2 BNT162b1 mRNA vaccine in younger and older Chinese adults: a randomized, placebo-controlled, double-blind phase 1 study. *Nat Med*. 2021;27(6):1062-1070.
11. Li J, Li X, Jiang J, et al. The Effect of Cognitive Behavioral Therapy on Depression, Anxiety, and Stress in Patients With COVID-19: A Randomized Controlled Trial. *Front Psychiatry*. 2020;11:580827.
12. Li L, Zhang W, Hu Y, et al. Effect of Convalescent Plasma Therapy on Time to Clinical Improvement in Patients With Severe and Life-threatening COVID-19: A Randomized Clinical Trial. *JAMA*. 2020;324(5):460-470.
13. Li T, Sun L, Zhang W, et al. Bromhexine Hydrochloride Tablets for the Treatment of Moderate COVID-19: An Open-Label Randomized Controlled Pilot Study. *Clin Transl Sci*. 2020;13(6):1096-1102.
14. Li Y, Xie Z, Lin W, et al. Efficacy and Safety of Lopinavir/Ritonavir or Arbidol in Adult Patients with Mild/Moderate COVID-19: An Exploratory Randomized Controlled Trial.

- Med (N Y)*. 2020;1(1):105-113 e104.
15. Lin YR, Wu FY, Xiao H, et al. Mycobacterium vaccae Nebulization in the Treatment of COVID-19: A Randomized, Double-Blind, Placebo-Controlled Trial. *J Aerosol Med Pulm Drug Deliv*. 2021;34(2):108-114.
  16. Liu X, Li Z, Liu S, et al. Potential therapeutic effects of dipyridamole in the severely ill patients with COVID-19. *Acta Pharm Sin B*. 2020;10(7):1205-1215.
  17. Liu Z, Qiao D, Xu Y, et al. The Efficacy of Computerized Cognitive Behavioral Therapy for Depressive and Anxiety Symptoms in Patients With COVID-19: Randomized Controlled Trial. *J Med Internet Res*. 2021;23(5):e26883.
  18. Luo Z, Chen W, Xiang M, et al. The preventive effect of Xuebijing injection against cytokine storm for severe patients with COVID-19: A prospective randomized controlled trial. *Eur J Integr Med*. 2021;42:101305.
  19. Pan HX, Liu JK, Huang BY, et al. Immunogenicity and safety of a severe acute respiratory syndrome coronavirus 2 inactivated vaccine in healthy adults: randomized, double-blind, and placebo-controlled phase 1 and phase 2 clinical trials. *Chin Med J (Engl)*. 2021;134(11):1289-1298.
  20. Pu J, Yu Q, Yin Z, et al. The safety and immunogenicity of an inactivated SARS-CoV-2 vaccine in Chinese adults aged 18-59 years: A phase I randomized, double-blinded, controlled trial. *Vaccine*. 2021;39(20):2746-2754.
  21. Ren Z, Luo H, Yu Z, et al. A Randomized, Open-label, Controlled Clinical Trial of Azvudine Tablets in the Treatment of Mild and Common COVID-19, A Pilot Study. *Adv Sci (Weinh)*. 2020:2001435.
  22. Shi L, Huang H, Lu X, et al. Effect of human umbilical cord-derived mesenchymal stem cells on lung damage in severe COVID-19 patients: a randomized, double-blind, placebo-controlled phase 2 trial. *Signal Transduct Target Ther*. 2021;6(1):58.
  23. Tang W, Cao Z, Han M, et al. Hydroxychloroquine in patients with mainly mild to moderate coronavirus disease 2019: open label, randomised controlled trial. *BMJ*. 2020;369:m1849.
  24. Tang X, Feng YM, Ni JX, et al. Early Use of Corticosteroid May Prolong SARS-CoV-2 Shedding in Non-Intensive Care Unit Patients with COVID-19 Pneumonia: A Multicenter, Single-Blind, Randomized Control Trial. *Respiration*. 2021;100(2):116-126.
  25. Wang JB, Wang ZX, Jing J, et al. Exploring an Integrative Therapy for Treating COVID-19: A Randomized Controlled Trial. *Chin J Integr Med*. 2020;26(9):648-655.
  26. Wang Y, Zhang D, Du G, et al. Remdesivir in adults with severe COVID-19: a randomised, double-blind, placebo-controlled, multicentre trial. *The Lancet*. 2020;395(10236):1569-1578.
  27. Wu CN, Xia LZ, Li KH, et al. High-flow nasal-oxygenation-assisted fiberoptic tracheal intubation in critically ill patients with COVID-19 pneumonia: a prospective randomised controlled trial. *Br J Anaesth*. 2020;125(1):e166-e168.
  28. Wu X, Li N, Wang G, et al. Tolerability, Safety, Pharmacokinetics, and Immunogenicity of a Novel SARS-CoV-2 Neutralizing Antibody, Etesevimab, in Chinese Healthy Adults: a Randomized, Double-Blind, Placebo-Controlled, First-in-Human Phase 1 Study. *Antimicrob Agents Chemother*. 2021;65(8):e0035021.
  29. Wu Z, Hu Y, Xu M, et al. Safety, tolerability, and immunogenicity of an inactivated SARS-CoV-2 vaccine (CoronaVac) in healthy adults aged 60 years and older: a randomised,

- double-blind, placebo-controlled, phase 1/2 clinical trial. *The Lancet Infectious Diseases*. 2021;21(6):803-812.
30. Xia S, Duan K, Zhang Y, et al. Effect of an Inactivated Vaccine Against SARS-CoV-2 on Safety and Immunogenicity Outcomes: Interim Analysis of 2 Randomized Clinical Trials. *JAMA*. 2020;324(10):951-960.
  31. Xia S, Zhang Y, Wang Y, et al. Safety and immunogenicity of an inactivated SARS-CoV-2 vaccine, BBIBP-CorV: a randomised, double-blind, placebo-controlled, phase 1/2 trial. *The Lancet Infectious Diseases*. 2021;21(1):39-51.
  32. Xu X, Zhang J, Zheng W, et al. Efficacy and safety of Reduning injection in the treatment of COVID-19: a randomized, multicenter clinical study. *Ann Palliat Med*. 2021;10(5):5146-5155.
  33. Yang S, Li Y, Dai L, et al. Safety and immunogenicity of a recombinant tandem-repeat dimeric RBD-based protein subunit vaccine (ZF2001) against COVID-19 in adults: two randomised, double-blind, placebo-controlled, phase 1 and 2 trials. *The Lancet Infectious Diseases*. 2021.
  34. Ye YA, Group GCC. Guideline-Based Chinese Herbal Medicine Treatment Plus Standard Care for Severe Coronavirus Disease 2019 (G-CHAMPS): Evidence From China. *Front Med (Lausanne)*. 2020;7:256.
  35. Zhang J, Rao X, Li Y, et al. Pilot trial of high-dose vitamin C in critically ill COVID-19 patients. *Ann Intensive Care*. 2021;11(1):5.
  36. Zhang Y, Zeng G, Pan H, et al. Safety, tolerability, and immunogenicity of an inactivated SARS-CoV-2 vaccine in healthy adults aged 18–59 years: a randomised, double-blind, placebo-controlled, phase 1/2 clinical trial. *The Lancet Infectious Diseases*. 2021;21(2):181-192.
  37. Zhao H, Zhu Q, Zhang C, et al. Tocilizumab combined with favipiravir in the treatment of COVID-19: A multicenter trial in a small sample size. *Biomed Pharmacother*. 2021;133:110825.
  38. Zheng F, Zhou Y, Zhou Z, et al. SARS-CoV-2 clearance in COVID-19 patients with Novaferon treatment: A randomized, open-label, parallel-group trial. *Int J Infect Dis*. 2020;99:84-91.
  39. Zhu F-C, Guan X-H, Li Y-H, et al. Immunogenicity and safety of a recombinant adenovirus type-5-vectored COVID-19 vaccine in healthy adults aged 18 years or older: a randomised, double-blind, placebo-controlled, phase 2 trial. *The Lancet*. 2020;396(10249):479-488.
  40. Ai J, Zhang Y, Zhang H, et al. Safety and immunogenicity of a third-dose homologous BBIBP-CorV boosting vaccination: interim results from a prospective open-label study. *Emerg Microbes Infect*. 2022;11(1):639-647.
  41. An X, Xu X, Xiao M, et al. Efficacy of Jinhua Qinggan Granules Combined With Western Medicine in the Treatment of Confirmed and Suspected COVID-19: A Randomized Controlled Trial. *Front Med (Lausanne)*. 2021;8:728055.
  42. Chen G-L, Li X-F, Dai X-H, et al. Safety and immunogenicity of the SARS-CoV-2 ARCoV mRNA vaccine in Chinese adults: a randomised, double-blind, placebo-controlled, phase 1 trial. *The Lancet Microbe*. 2022.
  43. Chen Y, Liu C, Wang T, et al. Efficacy and safety of Bufe Huoxue capsules in the



- management of convalescent patients with COVID-19 infection: A multicentre, double-blind, and randomised controlled trial. *J Ethnopharmacol.* 2022;284:114830.
44. Fan S, Zhen Q, Chen C, et al. Clinical efficacy of low-dose emetine for patients with COVID-19: a real-world study. *J BioX Res.* 2021;4(2):53-59.
  45. Fan Y, Shi Y, Zhang J, et al. The effects of narrative exposure therapy on COVID-19 patients with post-traumatic stress symptoms: A randomized controlled trial. *J Affect Disord.* 2021;293:141-147.
  46. Feng Y, Chen J, Yao T, et al. Safety and immunogenicity of inactivated SARS-CoV-2 vaccine in high-risk occupational population: a randomized, parallel, controlled clinical trial. *Infect Dis Poverty.* 2021;10(1):138.
  47. Gao Y, Xie J, Ye LS, Du J, Zhang QY, Hu B. Negative-Pressure Isolation Mask for Endoscopic Examination During the Coronavirus Disease 2019 Pandemic: A Randomized Controlled Trial. *Clin Transl Gastroenterol.* 2021;12(2):e00314.
  48. Gong X, Yuan B, Yuan Y, Li F. Efficacy and Safety of Lianhuaqingwen Capsules for the Prevention of Coronavirus Disease 2019: A Prospective Open-Label Controlled Trial. *Evid Based Complement Alternat Med.* 2021;2021:7962630.
  49. Guo W, Duan K, Zhang Y, et al. Safety and immunogenicity of an inactivated SARS-CoV-2 vaccine in healthy adults aged 18 years or older: A randomized, double-blind, placebo-controlled, phase 1/2 trial. *EClinicalMedicine.* 2021;38:101010.
  50. Han B, Song Y, Li C, et al. Safety, tolerability, and immunogenicity of an inactivated SARS-CoV-2 vaccine (CoronaVac) in healthy children and adolescents: a double-blind, randomised, controlled, phase 1/2 clinical trial. *The Lancet Infectious Diseases.* 2021;21(12):1645-1653.
  51. Hu F, Chen J, Chen H, et al. Chansu improves the respiratory function of severe COVID-19 patients. *Pharmacological Research - Modern Chinese Medicine.* 2021;1.
  52. Li J, Hou L, Guo X, et al. Heterologous AD5-nCoV plus CoronaVac versus homologous CoronaVac vaccination: a randomized phase 4 trial. *Nat Med.* 2022;28(2):401-409.
  53. Li J, Xia W, Zhan C, et al. A telerehabilitation programme in post-discharge COVID-19 patients (TERECO): a randomised controlled trial. *Thorax.* 2021.
  54. Li Q, Cui C, Xu F, et al. Evaluation of the efficacy and safety of hydroxychloroquine in comparison with chloroquine in moderate and severe patients with COVID-19. *Sci China Life Sci.* 2021;64(4):660-663.
  55. Li Y, Qi L, Bai H, et al. Safety, Tolerability, Pharmacokinetics, and Immunogenicity of a Monoclonal Antibody (SCTA01) Targeting SARS-CoV-2 in Healthy Adults: a Randomized, Double-Blind, Placebo-Controlled, Phase I Study. *Antimicrob Agents Chemother.* 2021;65(11):e0106321.
  56. Liu J, Huang B, Li G, et al. Immunogenicity and Safety of a Three-Dose Regimen of a SARS-CoV-2 Inactivated Vaccine in Adults: A Randomized, Double-blind, Placebo-controlled Phase 2 Trial. *J Infect Dis.* 2021.
  57. Liu J, Yang W, Liu Y, et al. Combination of Hua Shi Bai Du granule (Q-14) and standard care in the treatment of patients with coronavirus disease 2019 (COVID-19): A single-center, open-label, randomized controlled trial. *Phytomedicine.* 2021;91:153671.
  58. Liu ST, Zhan C, Ma YJ, et al. Effect of qigong exercise and acupuncture rehabilitation program on pulmonary function and respiratory symptoms in patients hospitalized with

- severe COVID-19: a randomized controlled trial. *Integr Med Res.* 2021;10:100796.
59. Lou Y, Liu L, Yao H, et al. Clinical Outcomes and Plasma Concentrations of Baloxavir Marboxil and Favipiravir in COVID-19 Patients: An Exploratory Randomized, Controlled Trial. *Eur J Pharm Sci.* 2021;157:105631.
  60. Meng FY, Gao F, Jia SY, et al. Safety and immunogenicity of a recombinant COVID-19 vaccine (Sf9 cells) in healthy population aged 18 years or older: two single-center, randomised, double-blind, placebo-controlled, phase 1 and phase 2 trials. *Signal Transduct Target Ther.* 2021;6(1):271.
  61. Meng X, Wang P, Xiong Y, et al. Safety, tolerability, pharmacokinetic characteristics, and immunogenicity of MW33: a Phase 1 clinical study of the SARS-CoV-2 RBD-targeting monoclonal antibody. *Emerg Microbes Infect.* 2021;10(1):1638-1648.
  62. Shi L, Yuan X, Yao W, et al. Human mesenchymal stem cells treatment for severe COVID-19: 1-year follow-up results of a randomized, double-blind, placebo-controlled trial. *EBioMedicine.* 2022;75:103789.
  63. Shu YJ, He JF, Pei RJ, et al. Immunogenicity and safety of a recombinant fusion protein vaccine (V-01) against coronavirus disease 2019 in healthy adults: a randomized, double-blind, placebo-controlled, phase II trial. *Chin Med J (Engl).* 2021;134(16):1967-1976.
  64. Sun S, Chen F, Yin C, et al. [Clinical efficacy of Liushenwan combined with routine treatment in COVID-19 patients]. *Chinese Traditional Patent Medicine.* 2021;43(8):4.
  65. Wang M, Zhao Y, Hu W, et al. Treatment of Coronavirus Disease 2019 Patients With Prolonged Postsymptomatic Viral Shedding With Leflunomide: A Single-center Randomized Controlled Clinical Trial. *Clin Infect Dis.* 2021;73(11):e4012-e4019.
  66. Xia S, Zhang Y, Wang Y, et al. Safety and immunogenicity of an inactivated COVID-19 vaccine, BBIBP-CorV, in people younger than 18 years: a randomised, double-blind, controlled, phase 1/2 trial. *The Lancet Infectious Diseases.* 2022;22(2):196-208.
  67. Xiao M, Tian J, Zhou Y, et al. Efficacy of Huoxiang Zhengqi dropping pills and Lianhua Qingwen granules in treatment of COVID-19: A randomized controlled trial. *Pharmacol Res.* 2020;161:105126.
  68. Zeng C, Yuan Z, Zhu J, et al. Therapeutic effects of traditional Chinese medicine (Maxingshigan-Weijing Decoction) on COVID-19: An open-label randomized controlled trial. *Integr Med Res.* 2021;10:100782.
  69. Zeng G, Wu Q, Pan H, et al. Immunogenicity and safety of a third dose of CoronaVac, and immune persistence of a two-dose schedule, in healthy adults: interim results from two single-centre, double-blind, randomised, placebo-controlled phase 2 clinical trials. *The Lancet Infectious Diseases.* 2021.
  70. Zhang J, Hu Z, He J, et al. Safety and immunogenicity of a recombinant interferon-armed RBD dimer vaccine (V-01) for COVID-19 in healthy adults: a randomized, double-blind, placebo-controlled, Phase I trial. *Emerg Microbes Infect.* 2021;10(1):1589-1597.
  71. Zhang Q, Zhou R, Yang J, et al. A Randomized, Double-Blind, Placebo-Controlled, First-in-Human Clinical Trial to Assess Safety, Tolerability, and Pharmacokinetics of LY-CovMab, a Potent Human Neutralizing Antibody Against SARS-CoV-2. *Infect Dis Ther.* 2022;11(1):405-422.
  72. Zhao C, Li L, Yang W, et al. Chinese Medicine Formula Huashibaidu Granule Early Treatment for Mild COVID-19 Patients: An Unblinded, Cluster-Randomized Clinical Trial.

- Front Med (Lausanne)*. 2021;8:696976.
73. Zhao H, Zhang C, Zhu Q, et al. Favipiravir in the treatment of patients with SARS-CoV-2 RNA recurrent positive after discharge: A multicenter, open-label, randomized trial. *Int Immunopharmacol*. 2021;97:107702.
  74. Zhong M, Sun A, Xiao T, et al. A Randomized, Single-Blind, Group Sequential, Active-Controlled Study to Evaluate the Clinical Efficacy and Safety of alpha-Lipoic Acid for Critically Ill Patients With Coronavirus Disease 2019 (COVID-19). *Front Med (Lausanne)*. 2021;8:566609.
  75. Zhou S, Feng J, Xie Q, et al. Traditional Chinese medicine shenhuang granule in patients with severe/critical COVID-19: A randomized controlled multicenter trial. *Phytomedicine*. 2021;89:153612.
  76. Zhu F, Jin P, Zhu T, et al. Safety and immunogenicity of a recombinant adenovirus type-5-vectored COVID-19 vaccine with a homologous prime-boost regimen in healthy participants aged 6 years and above: a randomised, double-blind, placebo-controlled, phase 2b trial. *Clin Infect Dis*. 2021.
  77. Zhu R, Yan T, Feng Y, et al. Mesenchymal stem cell treatment improves outcome of COVID-19 patients via multiple immunomodulatory mechanisms. *Cell Res*. 2021;31(12):1244-1262.
  78. Chen S, Lu C, Li P, et al. [Effectiveness of convalescent plasma for treatment of coronavirus disease 2019 patients]. *Zhonghua Wei Zhong Bing Ji Jiu Yi Xue*. 2020;32(11):1293-1298.
  79. Fang L, Zhu Q, Cheng W, et al. Retrospective analysis on 308 cases of COVID-19 and clinical application protocol of Kangyi Qiangshen Gong exercise prescription. *Shanghai Journal of Traditional Chinese Medicine*. 2020;54(5).
  80. Li L, Meng Y, Wang J, et al. Effect of Knowledge/Practice of COVID-19 Prevention Measures on Return-to-Work Concerns; Attitudes About the Efficacy of Traditional Chinese Medicine: Survey on Supermarket Staff in Huanggang, China. *Front Public Health*. 2021;9:722604.
  81. Shen Y, Ba Y, Hu Y, Wang L, Li W. Relationship between the dynamic changes of serum 2019-nCoV IgM/IgG and patient immunity after 6 month hospital discharge. *Inflamm Res*. 2021;70(2):241-247.
  82. Tang L, Jiang Y, Zhu M, et al. Clinical study using mesenchymal stem cells for the treatment of patients with severe COVID-19. *Frontiers of Medicine*. 2020;14(5):664-673.
  83. Tian J, Yan S, Wang H, et al. Hanshiyi Formula, a medicine for Sars-CoV2 infection in China, reduced the proportion of mild and moderate COVID-19 patients turning to severe status: A cohort study. *Pharmacol Res*. 2020;161:105127.
  84. Xu X, Jiang W, Chen L, et al. Evaluation of the safety and efficacy of using human menstrual blood-derived mesenchymal stromal cells in treating severe and critically ill COVID-19 patients: An exploratory clinical trial. *Clin Transl Med*. 2021;11(2):e297.
  85. Zhang X, Xue Y, Chen X, et al. Effects of Tanreqing Capsule on the negative conversion time of nucleic acid in patients with COVID-19: A retrospective cohort study. *J Integr Med*. 2021;19(1):36-41.
  86. Fang B, Zhang W, Wu X, et al. Shenhuang granule in the treatment of severe coronavirus disease 2019 (COVID-19): study protocol for an open-label randomized controlled clinical trial. *Trials*. 2020;21(1):568.

87. Li J, Zhang C, Wu Z, Wang G, Zhao H. The Mechanism and Clinical Outcome of patients with Corona Virus Disease 2019 Whose Nucleic Acid Test has changed from negative to positive, and the therapeutic efficacy of Favipiravir: A structured summary of a study protocol for a randomised controlled trial. *Trials*. 2020;21(1):488.
88. Liu F, Zhu Y, Zhang J, Li Y, Peng Z. Intravenous high-dose vitamin C for the treatment of severe COVID-19: study protocol for a multicentre randomised controlled trial. *BMJ Open*. 2020;10(7):e039519.
89. Liu P, Huang Z, Yin M, et al. Safety and Efficacy of Ixekizumab and Antiviral Treatment for Patients with COVID-19: A structured summary of a study protocol for a Pilot Randomized Controlled Trial. *Trials*. 2020;21(1):999.
90. Liu X, Chen H, Shang Y, et al. Efficacy of chloroquine versus lopinavir/ritonavir in mild/general COVID-19 infection: a prospective, open-label, multicenter, randomized controlled clinical study. *Trials*. 2020;21(1):622.
91. Lu ZH, Yang CL, Yang GG, et al. Efficacy of the combination of modern medicine and traditional Chinese medicine in pulmonary fibrosis arising as a sequelae in convalescent COVID-19 patients: a randomized multicenter trial. *Infect Dis Poverty*. 2021;10(1):31.
92. Nasb M, Sayed Shah ZA, Huang L, Li Q, Chen H. The curative effects of shortwave diathermy on treating Novel coronavirus (COVID-19) pneumonia: A structured summary of a study protocol for a randomised controlled trial. *Trials*. 2020;21(1):609.
93. Qin YY, Zhou YH, Lu YQ, et al. Effectiveness of glucocorticoid therapy in patients with severe coronavirus disease 2019: protocol of a randomized controlled trial. *Chin Med J (Engl)*. 2020;133(9):1080-1086.
94. Si MY, Xiao WJ, Pan C, et al. Mindfulness-based online intervention on mental health and quality of life among COVID-19 patients in China: an intervention design. *Infect Dis Poverty*. 2021;10(1):69.
95. Wang Y, Zhou F, Zhang D, et al. Evaluation of the efficacy and safety of intravenous remdesivir in adult patients with severe COVID-19: study protocol for a phase 3 randomized, double-blind, placebo-controlled, multicentre trial. *Trials*. 2020;21(1):422.
96. Wang ZY, Fu SZ, Xu L, et al. Impact of Shenfu injection on a composite of organ dysfunction development in critically ill patients with coronavirus disease 2019 (COVID-19): A structured summary of a study protocol for a randomized controlled trial. *Trials*. 2020;21(1):738.
97. Ye Q, Wang H, Xia X, et al. Safety and efficacy assessment of allogeneic human dental pulp stem cells to treat patients with severe COVID-19: structured summary of a study protocol for a randomized controlled trial (Phase I / II). *Trials*. 2020;21(1):520.
98. Zeng C, Yuan Z, Pan X, et al. Efficacy of Traditional Chinese Medicine, Maxingshigan - Weijing in the management of COVID-19 patients with severe acute respiratory syndrome: A structured summary of a study protocol for a randomized controlled trial. *Trials*. 2020;21(1):1029.
99. Zhang C, Li J, Wu Z, et al. Efficacy and safety of Anluohuaxian in the treatment of patients with severe Coronavirus disease 2019- a multicenter, open label, randomized controlled study: a structured summary of a study protocol for a randomised controlled trial. *Trials*. 2020;21(1):495.
100. Zhang S, Zhu Q, Zhan C, et al. Acupressure therapy and Liu Zi Jue Qigong for pulmonary

- function and quality of life in patients with severe novel coronavirus pneumonia (COVID-19): a study protocol for a randomized controlled trial. *Trials*. 2020;21(1):751.
101. Zhang Y, Li Z, He J, et al. Efficacy and safety of the combination of Liushen capsules and Arbidol in the treatment of COVID-19: protocol for a randomized, multi-center pilot study. *TMR Modern Herbal Medicine*. 2020;3(4).
102. Chen Y, He W, Lu W, et al. Bufeihuoxue capsules in the management of convalescent COVID-19 infection: study protocol for a multicenter, double-blind, and randomized controlled trial. *Pulm Circ*. 2021;11(3):20458940211032125.
103. Wu LH, Ye ZN, Peng P, et al. Efficacy and Safety of Washed Microbiota Transplantation to Treat Patients with Mild-to-Severe COVID-19 and Suspected of Having Gut Microbiota Dysbiosis: Study Protocol for a Randomized Controlled Trial. *Curr Med Sci*. 2021;41(6):1087-1095.
104. Zhang S, Lv Z, Zhu Q, et al. Efficacy of Liu-zi-jue in Patients with 2019 Novel Coronavirus Pneumonia (COVID-19): structured summary of a study protocol for a randomized controlled trial. *Trials*. 2020;21(1):416.
105. Zhang W, Xie Q, Xu X, et al. Baidu Jieduan granules, traditional Chinese medicine, in the treatment of moderate coronavirus disease-2019 (COVID-19): study protocol for an open-label, randomized controlled clinical trial. *Trials*. 2021;22(1):476.
